# Supplementary material for: Onset and ending of the late Palaeozoic ice age triggered by tectonically paced rock weathering
Source: Springer Nature journal article supplement (doi:10.1038/ngeo2931), 2017-04-10
Supplement: 41561_2017_BFngeo2931_MOESM194_ESM.pdf [file 41561_2017_BFngeo2931_MOESM194_ESM.pdf]

In the format provided by the authors and unedited.

# Onset and ending of the late Palaeozoic ice age triggered by tectonically paced rock weathering

6 Yves Godd ris<sup>\*</sup>, Yannick Donnadi u<sup>+</sup>, S bastien Carretier<sup>\*</sup>, Markus Aretz<sup>\*</sup>, Guillaume Dera<sup>\*</sup>,  
7 M lina Macouin<sup>\*</sup> and Vincent Regard<sup>\*</sup>

8

9 <sup>\*</sup>G osciences Environnement Toulouse, CNRS - UPS - IRD, Toulouse, France

10 <sup>+</sup>Laboratoire des Sciences du Climat et de l'Environnement, CNRS, Gif-sur-Yvette, France

11

12

13

## 1. Additional figures referred in the main text or in the method

14

15

16

17

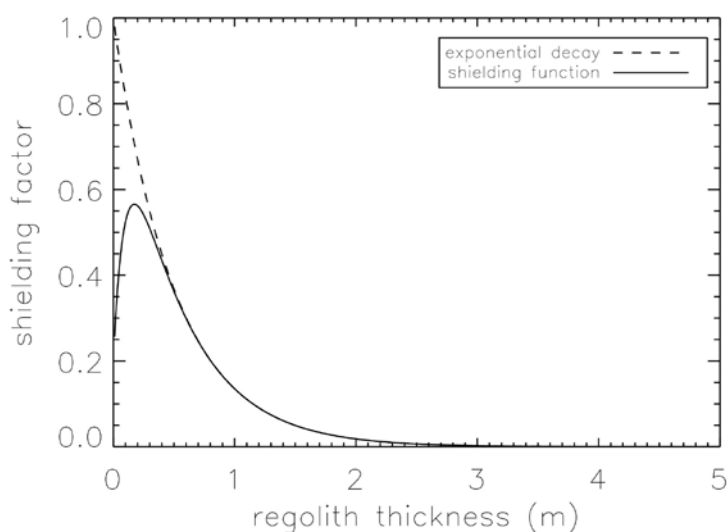

**Supplementary Figure 1:** The shielding factor as a function of saprolith thickness (solid line). The “humped” function behaves as an exponential decay for thick saproliths (Heimsath et al., 2009) (supply-limited weathering regime). For saprolith thinner than 20 cm, the “humped” function diverges from the exponential decay trend to simulate the transition towards a weathering-limited regime.

18

19

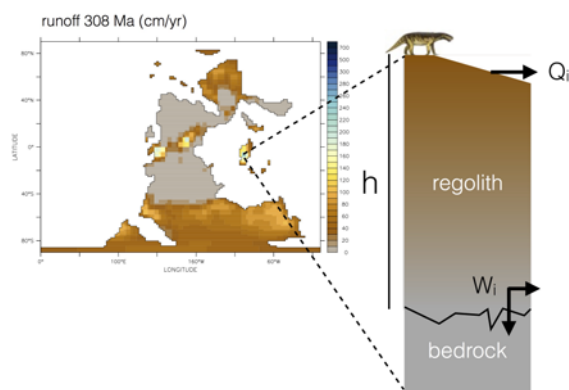

to the ocean  
via rivers

**Supplementary figure 2:** Schematic description of the saprolith model included in the GEOCLIM-REG simulations.  $W_i$  is the net saprolith production by chemical weathering. It is equal to the production of saprolith by chemical attack of the bedrock minus the loss by chemical weathering inside the saprolith.  $Q_i$  is the removal of saprolith by physical erosion. This mass balance is solved for each continental grid element until steady state is reached.

- $W_i$ : regolith production by chemical attack of the bedrock minus regolith loss by chemical dissolution inside the regolith (m/yr)
- $Q_i$ : regolith loss by physical erosion (m/yr)
- $h$ : regolith thickness (m/yr)

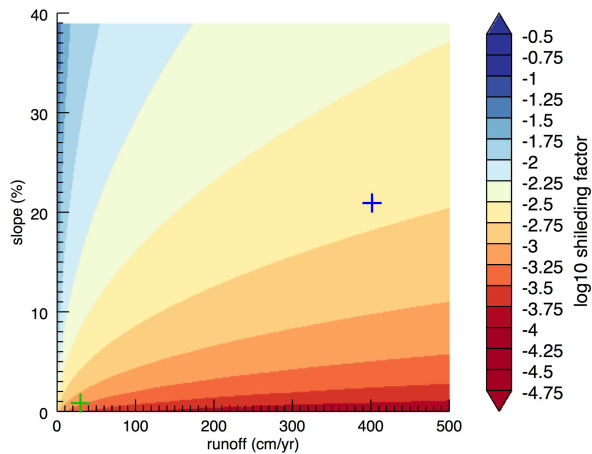

**Supplementary figure 3:**  $\log_{10}$  of the shielding factor calculated at steady state for a mean annual temperature of  $22^{\circ}\text{C}$  as a function of mean annual runoff and slope. The temperature is the mean annual temperature of the Rio Icacos (Puerto Rico, blue cross) and of the Nyong watershed (Cameroon, green cross). Both catchments are located in tropical humid environments, but the Rio Icacos displays steep slopes, which promote physical erosion. Consequently, the shielding factor is about one order of magnitude lower in Cameroon. Measurements predict weathering rates in the Nyong more than an order of magnitude below those in the Rio Icacos (compilation by Millot et al., 2002).

20  
21

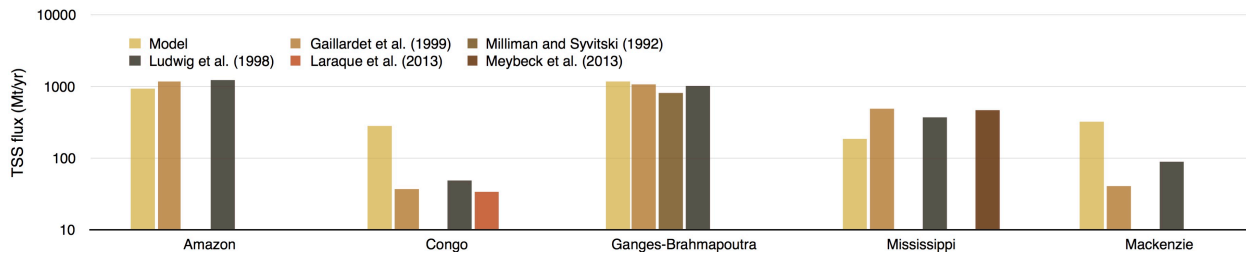

**Supplementary figure 4:** Present day fluxes of total suspended solid for various watersheds: comparison between the modeled flux and data (Gaillardet et al., 1999; Laraque et al., 2013; Ludwig and Probst, 1998; Meybeck et al., 2013; Milliman and Sivitski, 1992)

22  
23

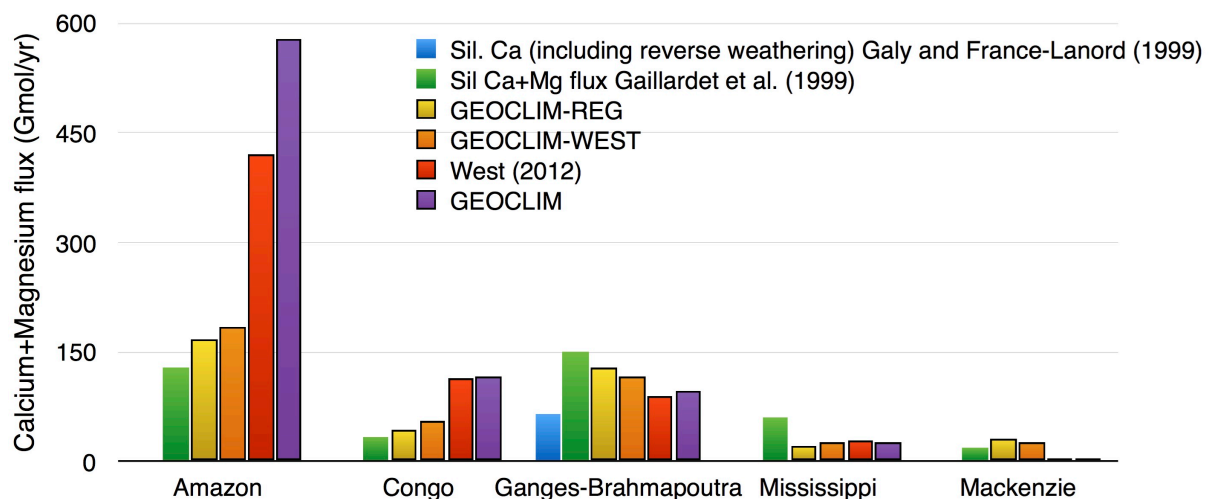

**Supplementary figure 5:** Present day consumption of atmospheric  $\text{CO}_2$  by silicate rock weathering: model-data comparison (Gaillardet et al., 1999; Galy and France-Lanord, 1999). The blue and green bars stand for the data. The violet and yellow bars represent the model output respectively without and with the shielding effect. The red bars stand for the West (2012) model, with the original best fit. The orange bars stand for the West model with the set of parameters described in the Methods.

Tournaisian (350 Ma)

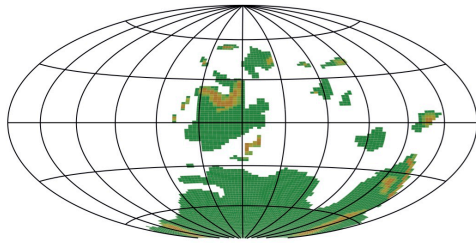

Penn.-Miss. boundary (323 Ma)

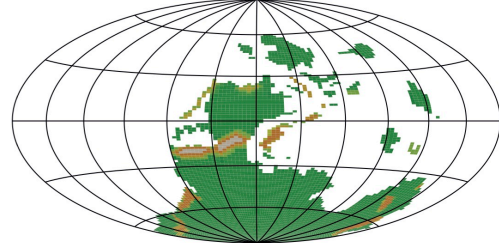

Moscovian (308 Ma)

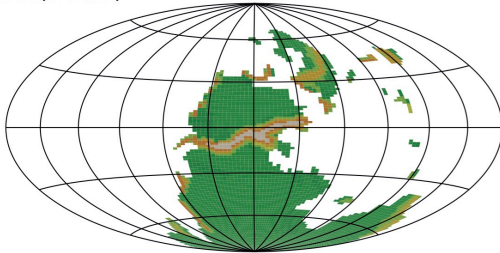

Sakmarian (290 Ma)

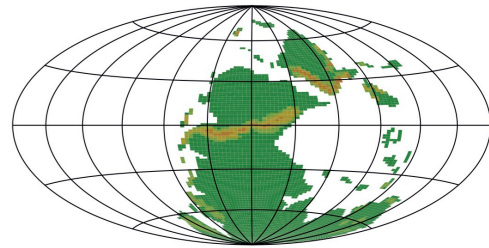

Cisur.-Guad. boundary (272 Ma)

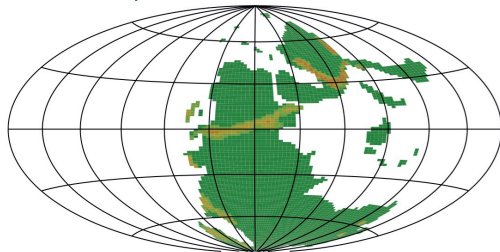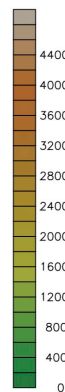

**Supplementary figure 6:** Paleogeographic maps of the Late Palaeozoic used in the simulations. The colored scale is the altitude (m).

24  
25

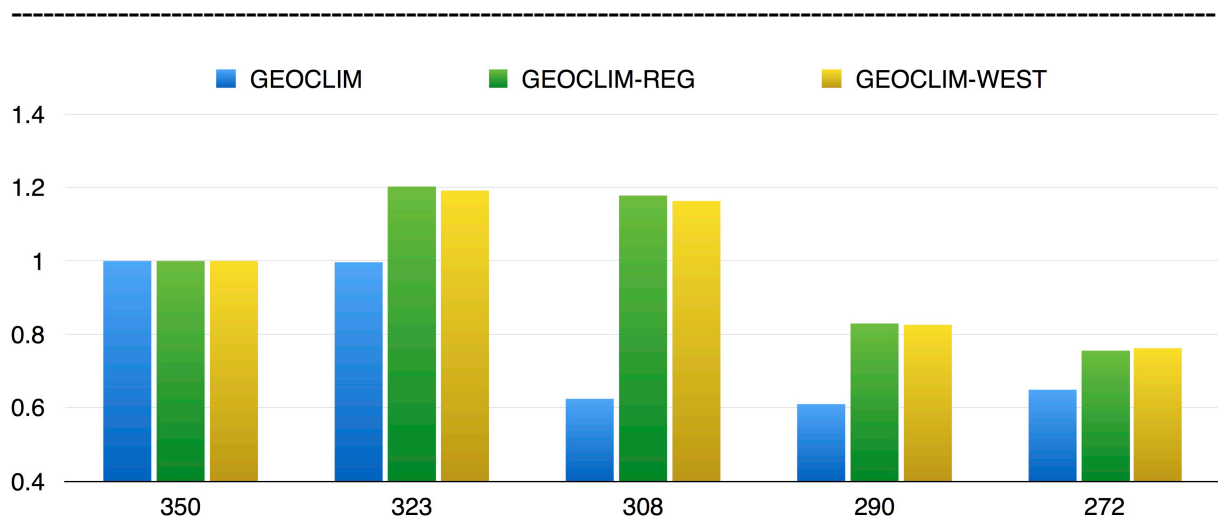

**Supplementary figure 7:** Consumption of CO<sub>2</sub> by continental silicate weathering normalized at its value at 350 Ma for each modeled time slice and for each simulation at 4 times the pre-industrial CO<sub>2</sub> level.

26

## 27 2. Additional information

28  
29

### 30 Paleogeographic maps

31

32 The maps are derived from Golonka (2002). They have been digitized at a spatial  
33 resolution of  $2.8^\circ$  in longitude and  $1.4^\circ$  in latitude (Supplementary figure 8). The 5 maps  
34 correspond to the geographic configuration of the Tournaisian (350 Ma), the Mississippian-  
35 Pennsylvanian boundary (323 Ma), the Moscovian (308 Ma), the end of the Sakmarian (290  
36 Ma), and the Cisuralian-Guadalupian boundary (272 Ma) (Supplementary figure 6). These  
37 maps have been used to define the outer shape (geographical extension) of the orogeny. To  
38 avoid an unrealistically sharp topographic break of several 1000 meters between the  
39 Hercynian Chain and the adjacent continental plains, the altitude on both sides of the Chain  
40 rises steady, in several steps as found in modern mountain ranges. Thus the highest altitudes  
41 are found mostly in the central parts of the Chain during the peak times of the orogeny.  
42

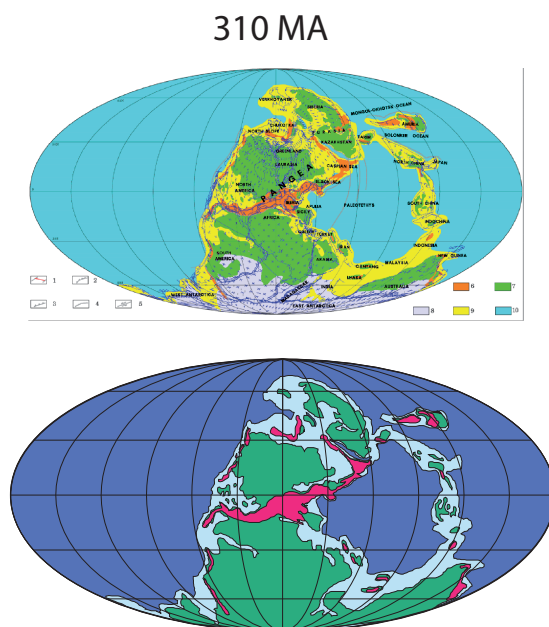

**Supplementary figure 8:** From original maps to numerical data. Upper panel shows the original map taken from Golonka (2002). Lower panel show paleogeography as used to build boundary conditions in FOAM. Note that the areal and extent of the Hercynian range (red shading on the lower panel) is directly taken from Golonka (2002). Our contribution has been to reconstruct altitude and slope for each time-slice.

43

44

45 The timing of the Hercynian orogeny is still a matter of debate. The Sudetic phase  
46 marking the definitive collision between Laurussia and Gondwana, occurs between 340 and  
47 310 Ma (Veevers, 2013). The crustal scale elevator tectonics starts at 350-340 Ma (Dorr and  
48 Zulauf, 2010). The maximum altitude was probably reached around 320 Ma (Lardeaux et al.,  
49 2001). The Asturic phase (300 Ma) closes the orogenic cycles (Veevers, 2004). Aside from  
50 the timing, major uncertainties remain about the shape and altitude of the orogen. It could  
51 have been a Himalayan type mountain range (Rubatto et al., 2010; Kroner and Romer, 2013),  
52 a high altitude plateau (Becq-Giraudon et al., 1996), or a succession of narrow mountain  
53 ranges (Franke, 2014).  
54

55 During the Tournaisian, we assume that the Hercynian orogenic phase was initiated,  
56 without distinctive relief (Supplementary Figure 6). The Hercynian range is only present on  
57 the four younger maps. Its maximum extension and altitude is reached during the Moscovian.  
58 We assume altitudes reaching 5000 m in the central section of the range (Becq-Giraudon et  
59 al., 1996; Fluteau et al., 2001). Then the altitude is decreasing with time: at 290 Ma, the  
60 maximum altitude is assumed to be 3000 m, and then falls to 2000 m at the end of the  
61 Cisuralian (Supplementary Figure 6).

62  
63 The model does not include a spatial resolution of the lithology. We implicitly assume  
64 that each continental grid cell contains carbonate, shield rock and young volcanic rock  
65 outcrops (diffuse lithology).

### 66 67 68 **Slopes in the past**

69  
70 For the five Paleozoic time slices, we define the slope of each grid cell from the  
71 present day correlation between slope and altitude (Supplementary figure 9). We add random  
72 noise to the calculated slopes. One possible bias of our simulations is the distribution of the  
73 altitudes on the continents: high altitudes and steep slopes are restricted to the reconstructed  
74 major mountain ranges, the remaining continental surface being flat (uniform altitude of 200  
75 m). The present day distribution of altitude is indeed much more noisy. Our procedure, based  
76 on the altitude/slope correlation, is thus pending on the past prescribed altitudes. As a result,  
77 the reconstructed past continental surfaces are divided into two clearly distinct domains in  
78 terms of slopes.

79  
80

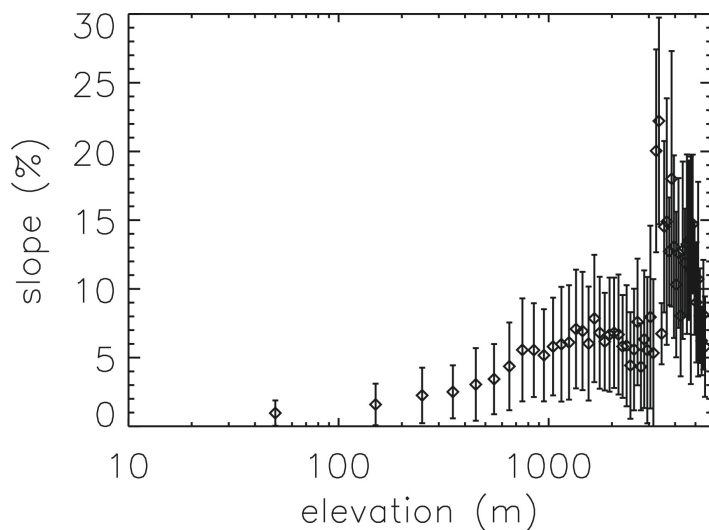

**Supplementary figure 9:** Relationship between the altitude (m) and the slope (%) for the present day world. The original data are extracted from SRTM (30'' resolution).

81

82  
83 In the present day correlation between slopes and altitudes, slopes are reaching their  
84 maximum values of about 20 % at 3000 m. Above 3000 m, slopes are declining to about 10 %  
85 (Supplementary figure 9). This feature is the imprint of the Tibetan high altitude plateau. In  
86 the GEOCLIM-REG simulation, we assume that the Hercynian orogeny is a Himalayan-type  
87 mountain range. Accordingly we keep the slopes around 20 % (with the additional random  
88 noise) even if the altitude of the Hercynian range exceeds 3000 m. An additional sensitivity

89 run, which assumes that the range is a high altitude plateau, has been performed using the  
 90 present day slope/altitude correlation (decreasing slopes above 3000 m). On Supplementary  
 91 figure 10, we produce a map of the Himalayan slopes and of the relationship between slope  
 92 and latitude for three 10° longitude-wide transects (data from Farr et al., 2007). The slopes  
 93 can reach 30% at some locations but these are extreme values. Slopes are mostly oscillating  
 94 between 5 and 15%. Mean values for these three transects are from 6 to 12 %. We then plot a  
 95 10° longitude-wide transect for the Hercynian range for each “slope” scenario, the  
 96 Himalayan-like one and the plateau one. Slopes for the two mountain ranges are similar,  
 97 showing that the Paleozoic slopes have not been overestimated. Mean values are 9.35 and 6.3  
 98 % for the two Paleozoic simulations, which are also within values found for the Himalayan  
 99 orogeny.  
 100  
 101

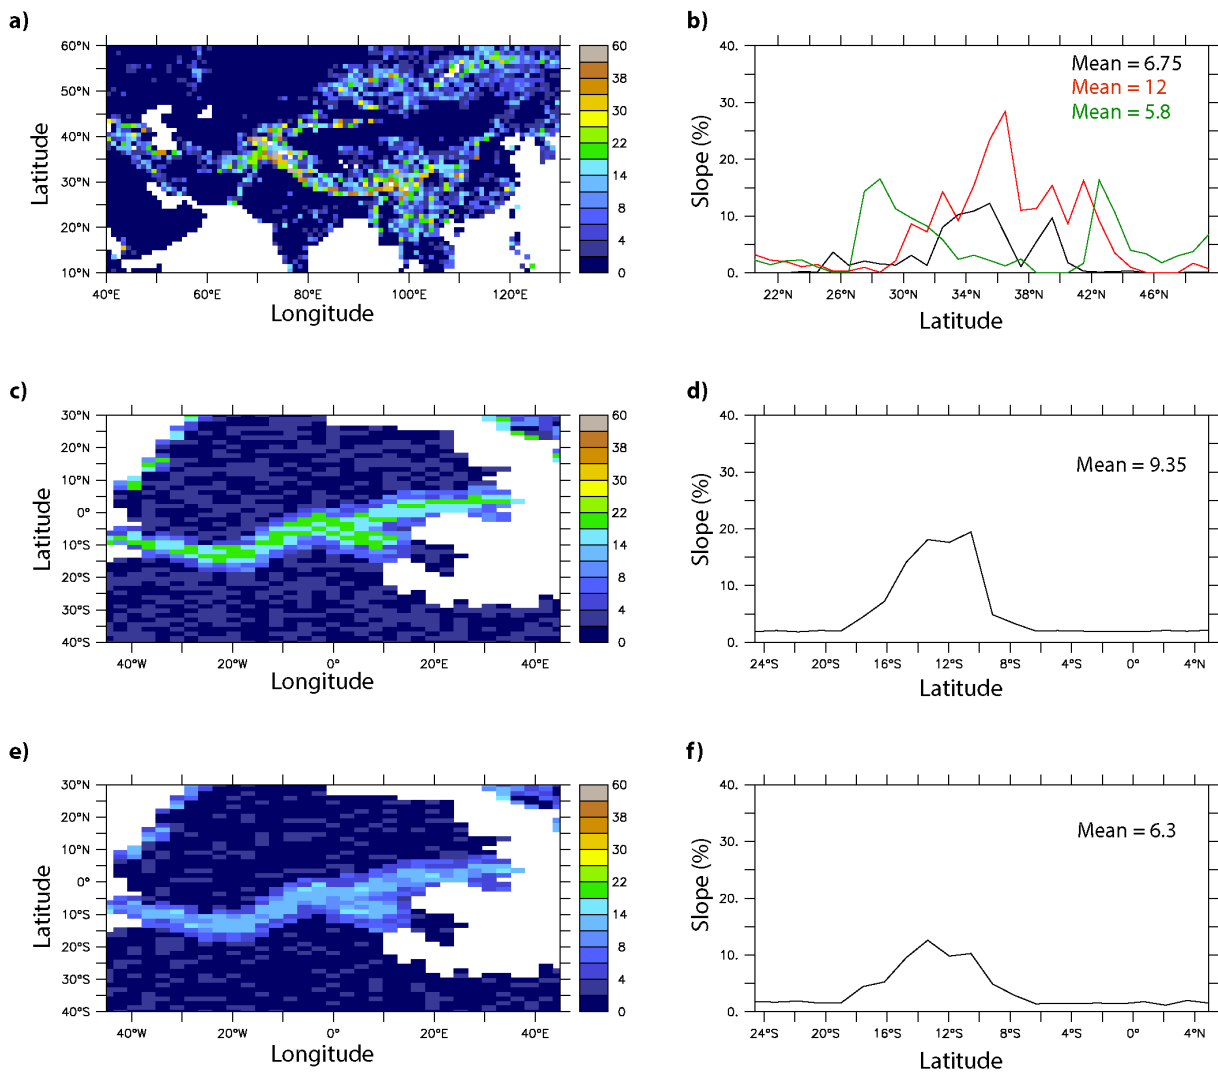

**Supplementary figure 10:** a) Actual slopes of the Himalayan region (SRTM DEM, Farr et al., 2007), c) Slopes of the Hercynian orogeny using the “Himalayan model” and e) Slopes of the Hercynian orogeny using a plateau-like range. b) Slope transects across the Himalayan ranges averaged over 10° longitude bands (black line = 60-70W; red line = 70W-80W and green line = 80W-90W). d) Slope transects across the Hercynian ranges averaged over 30W-20W. f) Same as d) but for the plateau scenario.

103  
104  
105  
106  
107  
108  
109  
110  
111  
112

### Starting CO<sub>2</sub> conditions at 350 Ma

Supplementary figure 11 shows that the CO<sub>2</sub> starting condition falls right in the middle of the range suggested by stomatal CO<sub>2</sub> proxies. In the GEOCLIM-REG simulations (Himalayan-type of mountain range), our model remains valid until the starting value stays below 2,500 ppmv (Supplementary figure 12). In the GEOCLIM-REG plateau simulations, a lower CO<sub>2</sub> starting value of 1,900 ppmv is required, which is still higher than the averaged CO<sub>2</sub> value as constrained by proxies (Supplementary figure 12).

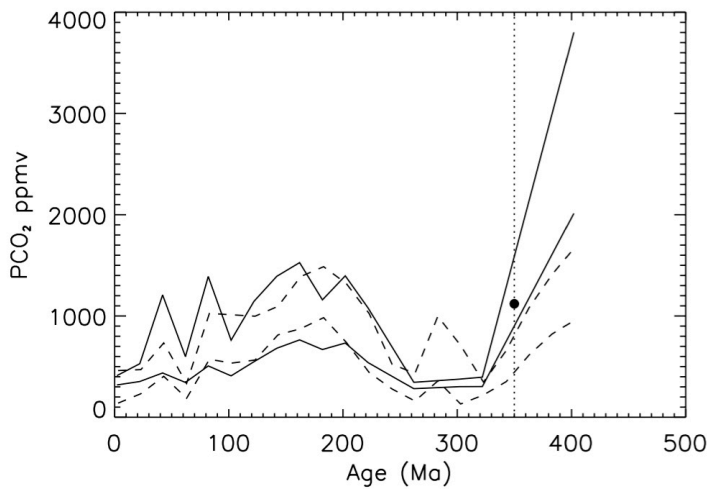

**Supplementary figure 11:** Proxy-based evolution of the atmospheric CO<sub>2</sub> level (Royer, personal communication, 2010). Solid lines: envelope containing 66 % of the CO<sub>2</sub> estimates based on stomatal index of fossil leaves. Dashed lines: envelope containing 66 % of the CO<sub>2</sub> estimates based on carbon isotopic compositions of pedogenic carbonates. The black dot stands for the initial value of CO<sub>2</sub> at 350 Ma (GEOCLIM, GEOCLIM-REG, GEOCLIM-WEST simulations).

113

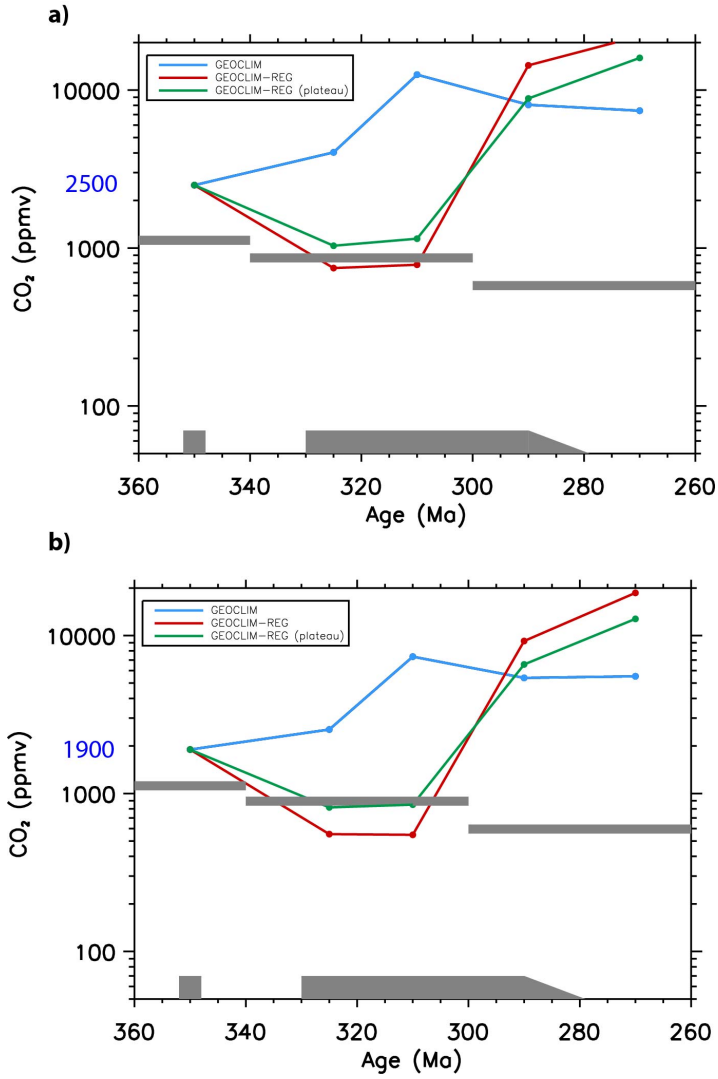

**Supplementary figure 12:** Calculated time evolution of the atmospheric CO<sub>2</sub> level for three simulations - a) for an initial CO<sub>2</sub> value of 2500 ppmv and b) for an initial CO<sub>2</sub> value of 1900 ppm.

114  
115  
116  
117  
118  
119

### The strontium isotopic model

The equation ruling the time evolution of the seawater <sup>87</sup>Sr/<sup>86</sup>Sr (François and Walker, 1992) can be written as:

$$M_{oc} \frac{dr_{oc}}{dt} = \sum_{i=1}^n f_{sil}^i \alpha_{sil} \left( \frac{r_{sil} - r_{oc}}{9.43 + r_{sil}} \right) + \sum_{i=1}^n f_{bas}^i \alpha_{bas} \left( \frac{r_{bas} - r_{oc}}{9.43 + r_{bas}} \right) + f_{MOR} \alpha_{MOR} \left( \frac{r_{MOR} - r_{oc}}{9.43 + r_{MOR}} \right) + \sum_{i=1}^n f_{carb}^i \alpha_{carb} \left( \frac{r_{carb} - r_{oc}}{9.43 + r_{carb}} \right)$$

120  
121  
122  
123  
124

where  $M_{oc}$  is the total mass of Sr in the ocean and  $r_{oc}$  is the <sup>87</sup>Sr/<sup>86</sup>Sr of seawater.  $n$  is the total number of continental grid cell. The  $f$  factors are the flux of carbon consumed by the weathering of basic rocks ( $bas$ ), by the weathering of all other silicate lithologies ( $sil$ ), by the weathering of carbonate rocks ( $carb$ ).  $f_{MOR}$  is the release of CO<sub>2</sub> by mid-oceanic ridge systems



125 (*MOR*) (held constant for all time slices). The  $\alpha$  factors are the proportionality constants  
 126 between the carbon and strontium fluxes.  $r_{sil}$ ,  $r_{bas}$ ,  $r_{MOR}$  and  $r_{carb}$  are the associated  $^{87}\text{Sr}/^{86}\text{Sr}$   
 127 ratios. The isotopic ratio of each source rock is assumed to be the same for each continental  
 128 grid cell. Assuming steady state (residence time of Sr in seawater is about 2 million years,  
 129 largely below the time resolution of the present study), we set the derivative term of the  
 130 equation to zero and solve it for  $r_{oc}$ .

131  $r_{carb}$  is assumed to be close to the average value of the seawater  $^{87}\text{Sr}/^{86}\text{Sr}$  prior to the period of  
 132 study, and is accordingly fixed at 0.708 (Veizer et al., 1999). The other isotopic ratios  $r$  are  
 133 calculated as follows (Vidal, 1994):

$$r_{MOR} = BABI + \left( \frac{{}^{87}\text{Rb}}{{}^{86}\text{Sr}} \right)_m (1 - e^{-\lambda t})$$

134 where  $t$  is the age of the considered time slice, with  $t=0$  at the origin of the Earth (age of the  
 135 Earth fixed at  $4.54 \times 10^9$  years). *BABI* is the Basaltic Achondrite Best Initial ratio and  $\lambda$  is the  
 136  $^{87}\text{Rb}$  decay constant.  $({}^{87}\text{Rb}/{}^{86}\text{Sr})_m$  is the  $^{87}\text{Rb}/{}^{86}\text{Sr}$  of the mantle.  $r_{bas}$  is set equal to  $r_{MOR}$ ,  
 137 implicitly assuming that young basaltic rocks have the  $^{87}\text{Sr}/^{86}\text{Sr}$  of the mantle at the age of the  
 138 considered time slice. Finally, the  $^{87}\text{Sr}/^{86}\text{Sr}$  of other silicate rocks is calculated as the  $^{87}\text{Sr}/^{86}\text{Sr}$   
 139 of continental rocks differentiated from the mantle about 2.5 byr ago:  
 140

$$r_{sil} = BABI + \left( \frac{{}^{87}\text{Rb}}{{}^{86}\text{Sr}} \right)_m (1 - e^{-\lambda \cdot 2 \cdot 10^9}) + \left( \frac{{}^{87}\text{Rb}}{{}^{86}\text{Sr}} \right)_{CC} (1 - e^{-\lambda(t - 2 \cdot 10^9)})$$

141  $({}^{87}\text{Rb}/{}^{86}\text{Sr})_{CC}$  is the  $^{87}\text{Rb}/{}^{86}\text{Sr}$  of the continental crust. This value is about 10 times bigger than  
 142 the corresponding mantle value (Vidal, 1994). We used it as a calibration constant so that the  
 143  $^{87}\text{Sr}/^{86}\text{Sr}$  of seawater equals 0.7092 under present day climatic conditions (control run). The  
 144 following table gives the values of the parameters.

145 **Parameters of the strontium isotopic budget**

| Parameter                                                    | Symbol                                     | value                  | units            | Reference            |
|--------------------------------------------------------------|--------------------------------------------|------------------------|------------------|----------------------|
| Carbonate rock $^{87}\text{Sr}/^{86}\text{Sr}$               | $r_{cw}$                                   | 0.708                  | -                | Veizer et al. (1999) |
| BABI                                                         | BABI                                       | 0.69897                | -                | Vidal (1994)         |
| Mantle Rb/Sr                                                 | $\text{RbSr}_m$                            | 0.025                  | -                | Vidal (1994)         |
| Mantle $^{87}\text{Rb}/^{86}\text{Sr}$                       | $({}^{87}\text{Rb}/{}^{86}\text{Sr})_m$    | 0.0699                 | -                | Vidal (1994)         |
| Continental crust Rb/Sr                                      | $({}^{87}\text{Rb}/{}^{86}\text{Sr})_{CC}$ | 0.1746                 | -                | calibrated           |
| $^{87}\text{Rb}$ decay constant                              | $\lambda$                                  | $1.42 \times 10^{-11}$ | $\text{yr}^{-1}$ | Vidal (1994)         |
| Mean age for the differentiation of the continental crust    | $T_c$                                      | $2.5 \times 10^9$      | yr               | Vidal (1994)         |
| Sr/C flux ratio for the weathering of basaltic rocks         | $\alpha_{bas}$                             | 0.00375                | -                | Wallman (2001)       |
| Sr/C flux ratio for the weathering Of other silicate rocks   | $\alpha_{sil}$                             | 0.0027                 | -                | Wallman (2001)       |
| Sr/C flux ratio at MOR                                       | $\alpha_{MOR}$                             | 0.00475                | -                | Wallman (2001)       |
| Sr/C flux ratio for the weathering Of continental carbonates | $\alpha_{carb}$                            | 0.00035                | -                | Wallman (2001)       |

147  
 148  
 149  
 150

### Spatial distribution of the shielding factor

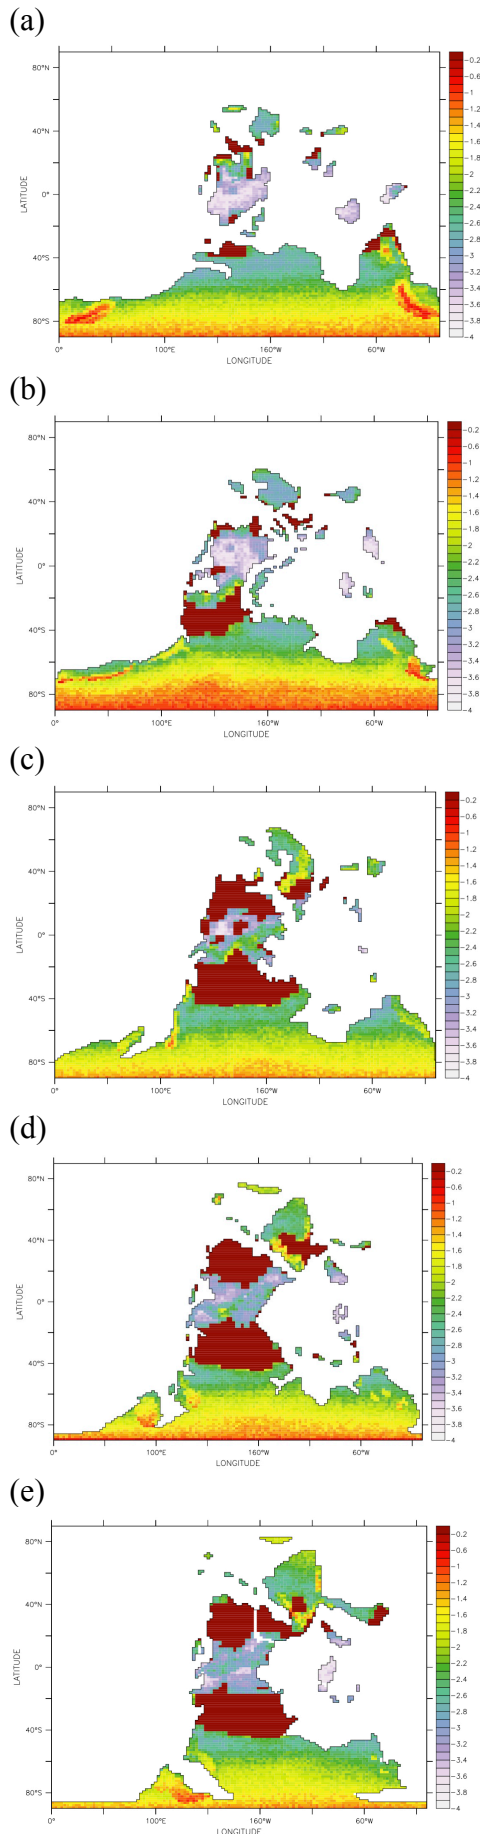

**Supplementary figure 13** displays the  $\log_{10}$  of the shielding factor for each time slice (GEOCLIM-REG simulation) under a constant  $\text{CO}_2$  of 4 times the pre-industrial level (1120 ppm). From the top to the bottom: 350 Ma, 323 Ma, 308 Ma, 290 Ma and 272 Ma. The shielding factor is arbitrarily set to 1 for regions where the calculated runoff is equal to 0 (those regions do not contribute to the global weathering flux). Comparing the maps at 350 Ma and 308 Ma, the shielding factor increases by 1 to 2 orders of magnitude in the equatorial area, due to the rise of the Hercynian mountain range.

## 151 **Atmospheric CO<sub>2</sub>**

152

153 The model-proxies CO<sub>2</sub> comparison shows a nice fit for Carboniferous times but a divergence  
154 between proxies and our model occurs for Permian times, the model calculating CO<sub>2</sub> largely  
155 above the 1σ-envelop of the available proxies. Two sets of proxies are available for the  
156 Carboniferous and Permian: one based on the stomatal index of fossil leaves, and the other on  
157 the δ<sup>13</sup>C of pedogenic carbonates from paleosols. The stomatal method is well known for its  
158 lack of precision for CO<sub>2</sub> levels above 1,000 ppm. The calibration of stomata proxy at high  
159 CO<sub>2</sub> is weakly constrained (Beerling and Royer, 2002; Beerling et al., 2009) and recent  
160 evidence that leaves adapt the size of the stomata and in addition their density at high CO<sub>2</sub>  
161 values (Franks and Beerling, 2009) raises questions about the validity of the stomatal proxy at  
162 high CO<sub>2</sub>. Smith et al. (2010) recently affirmed that the stomatal methods should probably be  
163 considered semi-quantitative under high CO<sub>2</sub> conditions and may represent CO<sub>2</sub> minima. As  
164 noted by Huber and Caballero (2011), « *existing proxy records have much greater accuracy*  
165 *at low CO<sub>2</sub> and once values are significantly higher than modern (somewhere above 560 to*  
166 *1220 ppm, depending on the proxy), there is little certainty in the actual value ». Regarding  
167 the paleosol proxy, the critical parameter is the amount of CO<sub>2</sub> respired in the soil. This  
168 parameter is fit on present day field measurements (Breecker et al., 2010), and then exported  
169 in the past. Its reliability probably decreases with increasing age, since biomes are  
170 increasingly different from the present day biomes. This said, the general temporal trends  
171 defined by proxy data are probably more reliable than absolute values. Our model simulations  
172 (GEOCLIM-REG and GEOCLIM-West) are in agreement with those trends.*

173 Nevertheless, modeled CO<sub>2</sub> levels depend on the sensitivity of the climate model to a CO<sub>2</sub>  
174 doubling. The atmospheric component of FOAM originates from the NCAR model, which  
175 has a relatively weak sensitivity of global mean temperature to increased greenhouse gas  
176 concentrations (2– 3 °C warming for doubling of atmospheric CO<sub>2</sub> levels). This sensitivity is  
177 at the lower end of the IPCC range. Doubling the climatic sensitivity in our model (see next  
178 section) does not alter our scenario but considerably reduces atmospheric CO<sub>2</sub> levels during  
179 Permian times (9 to 14 X).

180

## 181 **Climate sensitivity**

182

183 We describe here the procedure we apply to modify the climate sensitivity of the FOAM  
184 GCM. For each time slice and for each grid element  $i$ , we calculate a regression line (slope  $l_i$   
185 and ordinate at origin  $B_i$ ) fitting the annual temperature  $T_i$  calculated by the FOAM GCM as a  
186 function of the logarithm of the atmospheric CO<sub>2</sub> partial pressure.

187

$$T_i = l_i \cdot \log(PCO_2) + B_i$$

188

189 The slope of each line  $l_i$  is then multiplied by 2 and the new temperatures of each grid element  
190 are recalculated for each CO<sub>2</sub> level and for each time slice. The new runoff of each grid  
191 element is modified using the regression lines of runoff vs mean annual temperature  
192 calculated for each continental grid element from the FOAM GCM runs.

193

194

## 195 **Climatology**

196

197 The calculated runoff and air temperature at the surface corresponding to the calculated  
 198 steady state atmospheric CO<sub>2</sub> (GEOCLIM-REG simulation) for each time slice can be  
 199 downloaded at the following address:

200  
 201 <https://geoclimmodel.wordpress.com/download-area/>  
 202

203 The following table provides the atmospheric CO<sub>2</sub> for each time slice.  
 204

| Age (Ma) | Steady state atmospheric CO <sub>2</sub> (ppm)<br>(GEOCLIM_REG simulation) |
|----------|----------------------------------------------------------------------------|
| 350      | 1148                                                                       |
| 323      | 339                                                                        |
| 308      | 336                                                                        |
| 290      | 5320                                                                       |
| 272      | 13160                                                                      |

205  
 206  
 207  
 208  
 209

### Graphical representation of the CO<sub>2</sub> calculation method

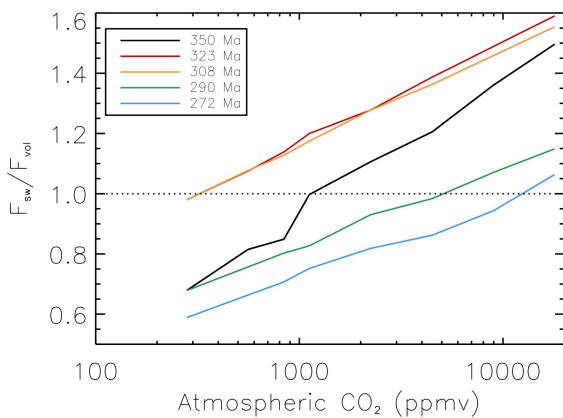

**Supplementary figure 14:** graphical representation of the method used to calculate the atmospheric CO<sub>2</sub> (GEOCLIM-REG case). Each curve represents the global CO<sub>2</sub> consumption by continental silicate weathering (sum of the contribution of each grid element) divided by the total solid Earth degassing (prescribed), as a function of atmospheric CO<sub>2</sub>. Steady state CO<sub>2</sub> is reached when the silicate weathering/CO<sub>2</sub> degassing ratio equals 1.

210  
 211

212 **Supplementary table 1: model parameters**

213

| Parameter        | Numerical value      | Units              | Reference               | Model                  |
|------------------|----------------------|--------------------|-------------------------|------------------------|
| $k_G^{CO_2}$     | $4.35 \cdot 10^{-4}$ | mol/m <sup>3</sup> | Calibration             | GEOCLIM<br>GEOCLIM-REG |
| $k_{G,b}^{CO_2}$ | $6.46 \cdot 10^{-5}$ | mol/m <sup>3</sup> | Calibration             | GEOCLIM<br>GEOCLIM-REG |
| $E_a$            | 48200                | J/mol              | Oliva et al.(2003)      | GEOCLIM<br>GEOCLIM-REG |
| $E_{a,b}$        | 42300                | J/mol              | Dessert et al. (2003)   | GEOCLIM<br>GEOCLIM-REG |
| $k_d$            | $4 \cdot 10^{-4}$    |                    | Calibration             | GEOCLIM-REG            |
| $k_a$            | $2.8 \cdot 10^2$     |                    | Calibration             | GEOCLIM-REG            |
| $k_1$            | 0.8                  |                    | Carretier et al. (2014) | GEOCLIM-REG            |
| $d_1$            | 0.5                  | m                  | Carretier et al. (2014) | GEOCLIM-REG            |
| $d_2$            | 0.1                  | m                  | Carretier et al. (2014) | GEOCLIM-REG            |
| $\rho$           | 8.314                | J/(mol K)          | Ideal gas constant      | GEOCLIM<br>GEOCLIM-REG |
| $k_{Gr}^{CO_2}$  | $7.23 \cdot 10^2$    | mol/m <sup>3</sup> | Calibration             | GEOCLIM-REG            |
| $K$              | $2.6 \cdot 10^{-4}$  |                    | West (2012)             | GEOCLIM-REGw           |
| $k_w$            | $7.6 \cdot 10^{-5}$  |                    | West (2012)             | GEOCLIM-REGw           |
| $E_a$            | 14600                | J/mol              | West (2012)             | GEOCLIM-REGw           |
| $z$              | 41                   | t/m <sup>2</sup>   | West (2012)             | GEOCLIM-REGw           |
| $\sigma+1$       | 1.13                 |                    | West (2012)             | GEOCLIM-REGw           |
| $k_{Grw}^{CO_2}$ | $2.15 \cdot 10^{15}$ |                    | Calibration             | GEOCLIM-REGw           |

214

215

216

217

218 **References**

- 219
- 220 Becq-Giraudon, J.-F., Montenat, C. & Van Den Driessche, J. Hercynian high-altitude  
221 phenomena in the French Massif Central: tectonic implications. *Palaeogeogr. Palaeoclim.*  
222 *Palaeoecol.* **122**, 277-241 (1996).
- 223
- 224 Beerling, D. J. and Royer, D. L.: Reading a CO<sub>2</sub> signal from fossil stomata, *New Phytol.*,  
225 153, 387–397, 2002
- 226
- 227 Beerling, D. J., Fox, A., and Anderson, C. W.: Quantitative uncertainty analyses of ancient  
228 atmospheric CO<sub>2</sub> estimates from fossil leaves, *Am. J. Sci.*, 309, 775–787,  
229 doi:10.2475/09.2009.01, 2009
- 230
- 231 Breecker, D.O., Sharp, Z.D., and McFadden, L.D. : Atmospheric CO<sub>2</sub> concentrations during  
232 ancient greenhouse climates were similar to those predicted for A.D. 2100. *Proc. Nat. Acad.*  
233 *Sci.*, 107, 576-580, 2010.
- 234
- 235
- 236 Carretier, S., Godd ris, Y., Delannoy, T. & Rouby, D. Mean bedrock-to-saprolite conversion  
237 and erosion rates during mountain growth and decline. *Geomorphology* **209**, 39-52 (2014).
- 238
- 239 Dessert, C., Dupr , B., Gaillardet, J., Fran ois, L. M. & All gre, C. J. Basalt weathering laws  
240 and the impact of basalt weathering on the global carbon cycle. *Chemical Geology* **202**, 257-  
241 273 (2003).
- 242
- 243 D rr, W. & Zulauf, G. Elevator tectonics and orogenic collapse of a Tibetan-style plateau in  
244 the European Variscides: the role of the Bohemian shear zone. *Int. J. Earth Sci.* **99**, 299-325  
245 (2010).
- 246
- 247 Farr, T.G., Rosen, P.A., Caro, E., Crippen, R., Duren, R., Hensley, S., Kobrick, M., Paller,  
248 M., Rodriguez, E., Roth, L., Seal, D., Shaffer, S., Shimada, J., Umland, J., Werner, M., Oskin,  
249 M., Burbank, D. & Alsdorf, D. The shuttle radar topography mission. *Rev. Geophys.*, 45,  
250 RG2004, doi: 10.1029/2005RG000183 (2007).
- 251
- 252 Fluteau, F., Besse, J., Broutin, J. & Ramstein, G. The Late Permian climate. What can be  
253 inferred from climate modelling concerning Pangea scenarios and Hercynian range altitude?  
254 *Palaeogeogr. Palaeoclim. Palaeoecol.* **167**, 39-71 (2001).
- 255
- 256 Fran ois, L.M. & Walker, J.C.G. Modelling the Phanerozoic carbon cycle and climate:  
257 constraints from the <sup>87</sup>Sr/<sup>86</sup>Sr isotopic ratio of seawater. *Am. J. Sci.* **292**, 81-135 (1992)
- 258
- 259 Franke, W. Topography of the Variscan orogeny in Europe: failed – not collapsed. *Int. J.*  
260 *Earth Sci.* **103**, 1471-1499 (2014).
- 261
- 262 Franks, P. J. and Beerling, D. J.: Maximum leaf conductance driven by CO<sub>2</sub> effects on  
263 stomatal size and density over geologic time, *P. Natl. Acad. Sci. USA*, 106, 10 343–10 347,  
264 doi:10.1073/pnas.0904209106, 2009
- 265

266 Gaillardet, J., Dupré, B., Louvat, P. & Allègre, C. J. Global silicate weathering and CO<sub>2</sub>  
267 consumption rates deduced from the chemistry of the large rivers. *Chemical Geology* **159**, 3-  
268 30 (1999).

269  
270 Galy, A. & France-Lanord, C. Weathering processes in the Ganges-Brahmaputra basin and  
271 the riverine alkalinity budget. *Chemical Geology* **159**, 31-60 (1999).

272  
273 Golonka, J. Plate-tectonic maps of the Phanerozoic, in Kiessling, W., Flügel, E., Golonka, J.  
274 (eds) *Phanerozoic Reef Patterns*, SEPM Special Publications **72**, 21-75 (2002).

275 Heimsath, A. M., Hancock, G. R. & Fink, D. The 'humped' soil production function: Eroding  
276 Arnhem Land, Australia. *Earth Surface Processes and Landforms* **34**, 1674-1684 (2009).

277  
278 Kroner, U. & Romer, R. L. Two plates – many subduction zones: the Variscan orogeny  
279 reconsidered. *Gondwana Res.* **24**, 298-329 (2013).

280  
281 Laraque, A. *et al.* A comparison of the suspended and dissolved matter dynamics of two large  
282 inter-tropical rivers draining into the Atlantic Ocean: the Congo and the Orinoco.  
283 *Hydrological Processes* **27**, doi:10.1002/hyp.9776 (2013).

284  
285 Lardeaux, J. M., Ledru, P., Daniel, I. & Duchene, S. The Variscan French Massif Central – a  
286 new addition to the ultra-high pressure metamorphic ‘club’: exhumation processes and  
287 geodynamic consequences. *Tectonophysics* **332**, 143-167 (2001).

288  
289 Ludwig, W. & Probst, J.-L. River sediment discharge to the oceans: present-day controls and  
290 global budget. *American Journal of Science* **298**, 265-295 (1998).

291  
292 Meybeck, M., Matti, K. & Dürr, H. Global hydrobelts and hydroregions: improved reporting  
293 scale for water-related issues? *Hydrology and Earth System Sciences* **17**, 1093-1111,  
294 doi:10.5194/hess-17-1093-2013 (2013).

295  
296 Milliman, J. D. & Syvitski, P. M. Geomorphic/tectonic control of sediment discharge to the  
297 ocean: importance of small mountainous rivers. *Journal of Geology* **100**, 524-544 (1992).

298  
299  
300 Millot, R., Gaillardet, J., Dupré, B. & Allègre, C. J. The global control of silicate weathering  
301 rates and the coupling with physical erosion: new insights from rivers of the Canadian Shield.  
302 *Earth and Planetary Science Letters* **196**, 83-98 (2002).

303  
304 Rubatto, D., Ferrando, S., Compagnoni, R. & Lombardo, B. Carboniferous high-pressure  
305 metamorphism of Ordovician protoliths in the Argentera Massif (Italy), southern European  
306 Variscan belt. *Lithos* **116**, 65-76 (2010).

307  
308 Smith, R. Y., Basinger, J. F., and Greenwood, D. R.: Depositional setting, fossil flora, and  
309 paleoenvironment of the Early Eocene Falkland site, Okanagan Highlands, British Columbia,  
310 Can. J. Earth Sci., 46, 811–822, doi:10.1139/E09-053, 2009

311  
312 Veevers, J. J. Gondwanaland from 650-500 Ma assembly through 320 Ma merger in Pangea  
313 to 185-100 Ma breakup: supercontinental tectonics via stratigraphy and radiometric dating.  
314 *Earth-Sci. Rev.* **68**, 1-132 (2004).

315

- 316 Veevers, J. J. Pangea: geochronological correlation of successive environmental and strati-  
317 tectonic phases in Europe and Australia. *Earth-Sci. Rev* **127**, 48-95 (2013).  
318
- 319 Veizer, J., Ala, D., Azmy, K., et al.  $^{87}\text{Sr}/^{86}\text{Sr}$ ,  $\delta^{13}\text{C}$  and  $\delta^{18}\text{O}$  evolution of Phanerozoic  
320 seawater. *Chem. Geol.* **161**, 59-88 (1999).  
321
- 322 Vidal, P. *Géochimie*, Dunod, 190 p., Paris (1994).  
323
- 324 Wallmann, K. Controls on the Cretaceous and Cenozoic evolution of seawater composition,  
325 atmospheric  $\text{CO}_2$  and climate. *Geochim. Cosmochim. Acta* **65**, 3005-3025 (2001).
